# Supplementary material for: miR-221 Augments TRAIL-Mediated Apoptosis in Prostate Cancer Cells by Inducing Endogenous TRAIL Expression and Targeting the Functional Repressors SOCS3 and PIK3R1
Source: Biomed Res Int. 2019 Nov 14;2019:6392748. doi: 10.1155/2019/6392748 (PMC6881584; doi:10.1155/2019/6392748)
Supplement: Supplementary Materials — Expression of XAF1 and XIAP in PC3 cells depending on pre-miR-221 transfection. [file 6392748.f1.pdf]

## Supplementary data

### Expression of XAF1 and XIAP in PC3 cells depending on pre-miR-221 transfection

| probeset ID | GENENAME                        | SYMBOL | Nr 1_Pre-Mir-221 | Nr 1_pre 221 | Nr 3_Ctrl | logFC  |
|-------------|---------------------------------|--------|------------------|--------------|-----------|--------|
| 235222_x_at | X-linked inhibitor of apoptosis | XIAP   | 24,581           | 25,601       | 25,709    | -0,135 |
| 206536_s_at | X-linked inhibitor of apoptosis | XIAP   | 22,663           | 22,817       | 22,153    | -0,535 |
| 243026_x_at | X-linked inhibitor of apoptosis | XIAP   | 23,925           | 24,820       | 24,891    | -0,136 |
| 206537_at   | X-linked inhibitor of apoptosis | XIAP   | 21,646           | 21,820       | 21,363    | -0,416 |
| 225859_at   | X-linked inhibitor of apoptosis | XIAP   | 25,365           | 24,847       | 24,955    | -0,022 |
| 228363_at   | X-linked inhibitor of apoptosis | XIAP   | 26,652           | 26,483       | 26,719    | -0,053 |
| 225858_s_at | X-linked inhibitor of apoptosis | XIAP   | 25,944           | 25,728       | 25,862    | -0,010 |
| 228617_at   | XIAP associated factor 1        | XAF1   | 25,023           | 28,796       | 21,684    | -4,728 |
| 206133_at   | XIAP associated factor 1        | XAF1   | 21,958           | 24,858       | 19,815    | -3,368 |
| 242234_at   | XIAP associated factor 1        | XAF1   | 21,092           | 23,388       | 20,138    | -1,769 |

**Table S1.** Transient transfection with pre-miR-221 significantly induced the expression of XAF1 compared to control transfections in PC3 cells (48h p. t.) within our microarray experiments. In contrast, no significant change in expression could be detected for XIAP.

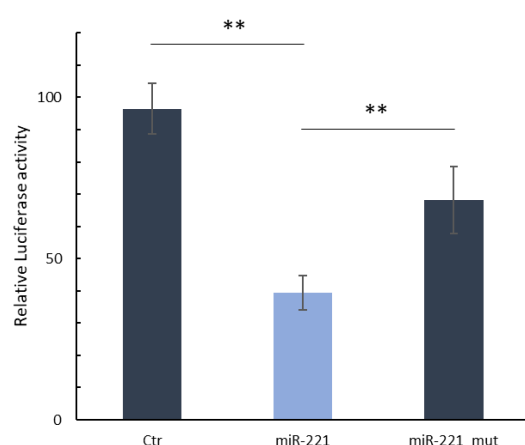

**Figure S1.** Luciferase reporter assays confirmed a specific binding of miR-221 and PIK3R1 3'UTR in PC3 cells. Compared to pre-miR-Ctr transfected cells, pre-miR-221 transfected PC3 cells displayed a highly significant reduction of relative Luciferase activity. The right column represents the relative Luciferase activity for pre-miR-221 transfected PC3 cells with a mutated PIK3R1 binding site. Data represent mean + SD of four independent experiments. \*:  $p < 0.05$ , \*\*:  $p < 0.01$ .
